# Supplementary material for: A mutant Tat protein inhibits infection of human cells by strains from diverse HIV-1 subtypes
Source: Springer Nature journal article supplement (doi:10.1186/s12985-017-0705-9), 2017-03-14
Supplement: MOESM1 [file 12139016]

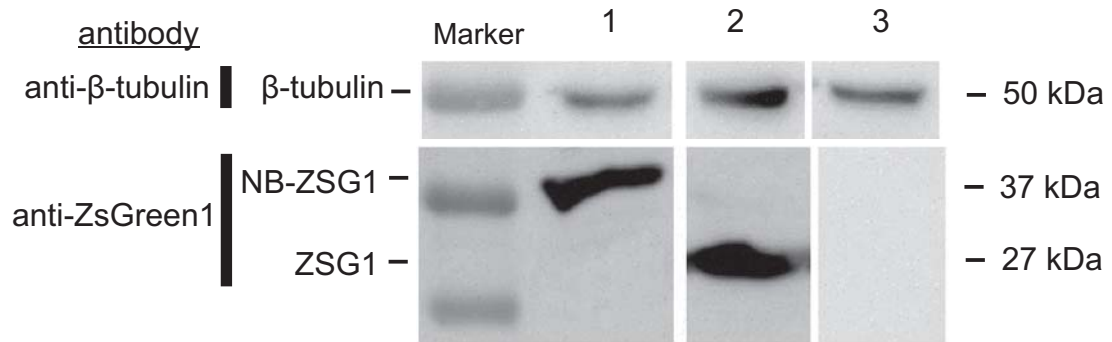

**Additional file 1.** Western blot of cell lysates prepared from CD4+ T cells expressing; 1. NB-ZSG1, 2. ZSG1 or 3. non-transduced cells using anti- $\beta$ -tubulin or anti-ZsGreen1 antibodies.
